# Supplementary material
Source: PubMed Central journal article supplement (PMC3421999)
Supplement: MCB.00247-12_zmb999109621so1.pdf [file MCB.00247-12_zmb999109621so1.pdf]

## **Supplemental Materials and methods**

### **Gobal run-on sequencing (GRO-seq)**

The GRO-seq libraries were prepared as in Core et al. 2008 (2), except the sequencing adapter was added using the polyadenylation and reverse transcription method developed in the Weismann lab (3).

Ten million nuclei isolated from 2 biological replicates of LacZ-RNAi and Fcp1-RNAi cells were allowed to run-on for 10 minutes at 30°C in a reaction containing ATP, CTP, GTP, and BrUTP. The RNA was isolated using Trizol and acid phenol extractions. The RNAs were base hydrolyzed to an average length of 100-150 nucleotides, and RNAs with incorporated BrU were purified with 2 immunoprecipitations successive using Anti-BrdUTP agarose. The RNA was treated with PNK and polyadenylated using E. coli polyA polymerase to add 50-100 As to their 3' ends. The polyadenylated RNA was reverse transcribed used with the following bar coded oligonucleotides (one for each replicate):

INOO3:

5'-pTAGAGATCGTCCGACTGTAGAACTCT-iSp18-CAAGCAGAAGACGGCATAACGATTTTTTTTTTTTTTTTTTTTTV

INOO4:

5'-pTGATGATCGTCCGACTGTAGAACTCT-iSp18-CAAGCAGAAGACGGCATAACGATTTTTTTTTTTTTTTTTTTTTV

The underlined sequence indicates the bar-code and iSp18 indicates an 18 carbon spacer between two oligo linkers used for Illumina sequencing.

The resulting DNA was gel extracted and circularized using Epicentre CirLigase (catalog # CL4111K), and PCR amplified for 12-15 cycles. The two bar-coded libraries for each treatment were combined and sequenced using Illumina sequencer.

After linker removal, the reads were trimmed to 26 nucleotides, and the reads were mapped to non-repetitive regions of the *Drosophila* genome using Bowtie. The reads were assigned to either the promoter (100bp region with the most reads within 250bp of the TSS) or the gene body (500bp downstream of the TSS to the 3' end of the gene). The gene regions with statistically significant differences in read counts between the LacZ-RNAi and Fcp1-RNAi libraries were determined using edgeR (4).

### **Laser Scanning Confocal Microscopy**

The *Drosophila* salivary glands in Figure S1 were dissected from wandering 3rd instar larvae as previously described (6), immediately transferred to a MatTek glass bottom dish, and a coverslip was placed over the sample. The samples were heat shocked using a preheated C-Apochromat 63x, 1.2 NA, water immersion objective as previously described (7). At 10 minute HS, 2-channel color (RFP and GFP) images were captured using a Carl Zeiss 710 laser scanning microscope.

Fly lines used in this study:

#### Line

6983, salivary gland specific GAL4 driver  
mRFP-Pol II, 6983  
7017, Gal80-ts line  
WizFcp1 RNAi line  
GFP-Fcp1

#### Source

(Bloomington stock center)  
(7)  
(Bloomington stock center)  
(5)  
(see below)

### **Generation of GFP-Fcp1 constructs**

The full length Fcp1 cDNA from the pDONR221 vector (see materials and methods in the main text) was transferred to the pTWG vector (Murphy Lab) vector. The GFP-Fcp1 fusion construct was introduced into the *Drosophila* germ line by P-element mediated transformation as previously described (1).

#### Primer sets used in this study

**Fcp1 Cloning** (Gateway adapter sequence is underlined)

Forward

GGGGACAAGTTTGTACAAAAAAGCAGGCTTGATGCAGAACATACCGGACGAGG

Reverse

GGGGACCACTTTGTACAAGAAAGCTGGGTACATGTCAAAGTCCTCCAGGCCGAG

Quick change forward (for catalytically dead mutant)

GCGCGCCAGGGGGCGTGGCCGCATCTGG

Quick change reverse (for catalytically dead mutant)

CCAGATGCGGCCACGCCCCCTGGCGCGC

**Templates for dsRNAs** (T7 promoter sequence is underlined in each primer)

LacZ forward

GAATTAATACGACTCACTATAGGGAGAGATATCCTGCTGATGAAGC

LacZ reverse

GAATTAATACGACTCACTATAGGGAGAGCAGGAGCTCGTTATCGC

Fcp1 (A) forward

GAATTAATACGACTCACTATAGGGATAAGACGGAATCCAGCAGCGAAGT

Fcp1 (A) reverse

GAATTAATACGACTCACTATAGGGATAACCTTGTAGGTGCCTGCGTTGA

Fcp1 (B) forward

GAATTAATACGACTCACTATAGGGACACCAATGGACAAGAAGCTG

Fcp1 (B) reverse

GAATTAATACGACTCACTATAGGGAGCCGAGGAACTCCCTTTCTA

Fcp1 (C) forward

GAATTAATACGACTCACTATAGGGAGTCCAACAGCGAGAAGGAA

Fcp1 (C) reverse

GAATTAATACGACTCACTATAGGGAGTCCGCTGAAACGGAATTTA

CyclinT1 forward

GAATTAATACGACTCACTATAGGGAATGAGTCTCCTAGCCACGCCAA

CyclinT1 reverse

GAATTAATACGACTCACTATAGGGACTTTGACCAGCTGGCAGGTGCG

#### **qPCR primers**

Hsp70-154 primer set

Hsp70-200F TGGCAGAAAGAAAAGCTCGAGAAA

Hsp70-108R GACAGAGTGAGAGAGCAATAGTACAGAGA

Hsp70+96 primer set

Hsp70+56F: ACAAGCGCAGCTGAACAAGCTA

Hsp70+137R: ACTTGGTTGTTGGTTACTTT

Hsp70+379 primer set

Hsp70+334F CACCACGCCGTCCTACGT

Hsp70+423R GGTTTCATGGCCACCTGGTT

Hsp70+682 primer set

Hsp70+645F ATATCTGGGCGAGAGCATCACACA

Hsp70+718R GTAGCCTGGCGCTGGGAGTC

Hsp70+946 primer set

Hsp70+872F CATCGACGAGGGATCTCTGTTC

Hsp70+1019R GGCGCGAGGGTTGGA

Hsp70+1427 primer set

Hsp70+1363F CTGTGCAGGCCGCTATCC

Hsp70+1490R GCGCTCGATCAGCTTGGT

Hsp70+1702 primer set

Hsp70+1649F GGGTGTGCCCCAGATAGAAG

Hsp70+1754R TGTCGTTCTTGATCGTGATGTTC

Hsp70+1952 primer set

Hsp70Ab+1925F TGGACGAGGCTGACAAGAAGT

Hsp70Ab+1978R ACCGGATAGTGTTCGTTGCACTT

Hsp70Ab+2211 primer set

Hsp70Ab+2155F GGTCGACTAAGGCCAAAGAGTCTA

Hsp70Ab+2266R TCGATCGAAACATTCTTATCAGTCTCA

Hsp70Ab+2669 primer set

Hsp70Ab+2631F TCGCAGACACCGCATTGT

Hsp70Ab+2706R ACCAATTGCAACAGAGACTGGAA

Hsp70Ab+4080 primer set

Hsp70Ab+4035F TGAAACTGCCTCCAACAAGT

Hsp70Ab+4124R AGACGCACGAGACCAATCTGTA

Background

Forward GCAGGGATTTCTCAGCCATA

Reverse CCGGGGAGAAGTAAAGGACT

Hsp26+7 primer set

Hsp26-22F CGAACAGAGCACAGATCGAATTC

Hsp26+36R GAGTTGTTCACTGCTCGA

Hsp26+229 primer set

Hsp26+200F TCGCTTGTGGATGAACTCCA

Hsp26+259R CAATCCCAGTCCAAGCTCGT

Hsp26+624 primer set

Hsp26+580F CAAGGTTCCCGATGGCTACA

Hsp26+667R CTGCGGCTTGGGAATACTGA

Hsp83-45 primer set

Hsp83-100F AAGTTGCATCCCTGGCATCCAGAA

Hsp83+10R TTTCAAGACTCGAACCGGCAAACG

Hsp83+288 primer set

Hsp83+224F AAAGAGTGAATAGTTTATCAGTGGCTATGG

Hsp83+352R GGGTCAAGAACATTCGAGATGCACAG

Hsp83+1268 primer set

Hsp83+1218F GCTTCCGATGCCCTAGACAA

Hsp83+1318R TCCTTGCCAGAGTCCAGCTT

Hsp83+3680 primer set

Hsp83+3628F GCGACCAGTCGAAACAAACAACCA

Hsp83+3732R AACTCGGCCGTAGTAAACTCAG

RpL32+60 primer set

RpL32+10F TCTGGTTTCCGGCAAGGTATGT

RpL32+110R GCAGTTCAACTCGAAACCGCCAAA

RpL32+291 primer set

RpL32+241F ATACTGCCCAAGAAGCTAGCCCAA

RpL32+341R GCACTGACCCACTGGAAATATCAC

RpL32+563 primer set

Rp49+549F CCCAAGGGTATCGACAACAGA

Rp49+613R CGATGTTGGGCATCAGATACTG

B1-tub+44 primer set

B1-tub+5F GCTCTCCAAAGCGAATGCACTA

B1-tub+82R CGCTTATAGCAGTCGAACACAACA

B1-tub+754 primer set

B1-tub+714F TGCCCAGATGGTGAAGGGTACTTT

B1-tub+793R ATGAGCAGCAAGCTCTTATGTGCG

B1-tub+1460 primer set

B1-tub+1423F AACCAACCCTCGGAAACGCCTT

B1-tub+1496R TGAGAGCCATACTTGGGCACAACA

B1-tub+2686 primer set

B1-tub+2648F TGTATGCAGCAGATGGTCTAGGCT

B1-tub+2723R GACTTGGCCAATGAGTCATCACAG

Thor+75 primer set

Thor+15F AACAGCCAACGGTGAACACATAGC

Thor+135R TAAGCACACTCGATATGGCTGCGA

Thor+742 primer set

Thor+697F ATGCAACGCAGACCACCTTGACTA

Thor+787R TCTTCATGAAAGCCCGCTCGTAGA

pnr+123 primer set

pnr+76F CATTCCAATCAGAACGCGCACACA

pnr+170R TCGGAATCCAACCTGAAGGCAAGGA

pnr+4254 primer set

pnr+4214F TGGCGATATTGCTATCAAGGCGGA

pnr+4294R ATGTCCGGAGATTATGGCTCCCTT

pnr+16473 primer set

pnr+16432F AGTGCAAGGAGGAGCATGGTAAGT

pnr+170R AGATGGGCAAACGGTGATGAGTGT

### **Supplemental References**

1. **Brand, A. H., and N. Perrimon.** 1993. Targeted gene expression as a means of altering cell fates and generating dominant phenotypes. *Development* (Cambridge, England) **118**:401-15.
2. **Core, L. J., J. J. Waterfall, and J. T. Lis.** 2008. Nascent RNA Sequencing Reveals Widespread Pausing and Divergent Initiation at Human Promoters. *Science* **322**:1845-1848.
3. **Ingolia, N. T., S. Ghaemmaghami, J. R. S. Newman, and J. S. Weissman.** 2009. Genome-wide analysis in vivo of translation with nucleotide resolution using ribosome profiling. *Science* (New York, N.Y.) **324**:218-23.
4. **Robinson, M. D., D. J. McCarthy, and G. K. Smyth.** 2010. edgeR: a Bioconductor package for differential expression analysis of digital gene expression data. *Bioinformatics* (Oxford, England) **26**:139-40.
5. **Tombácz, I., T. Schauer, I. Juhász, O. Komonyi, and I. Boros.** 2009. The RNA Pol II CTD phosphatase Fcp1 is essential for normal development in *Drosophila melanogaster*. *Gene* **446**:58-67.
6. **Yao, J., K. L. Zobeck, J. T. Lis, and W. W. Webb.** 2008. Imaging transcription dynamics at endogenous genes in living *Drosophila* tissues. *Methods* (San Diego, Calif.) **45**:233-41.
7. **Zobeck, K. L., M. S. Buckley, W. R. Zipfel, and J. T. Lis.** 2010. Recruitment timing and dynamics of transcription factors at the Hsp70 loci in living cells. *Molecular cell*. Elsevier Inc. **40**:965-75.

**Figure S1**

**20'HS, 60' recovery**

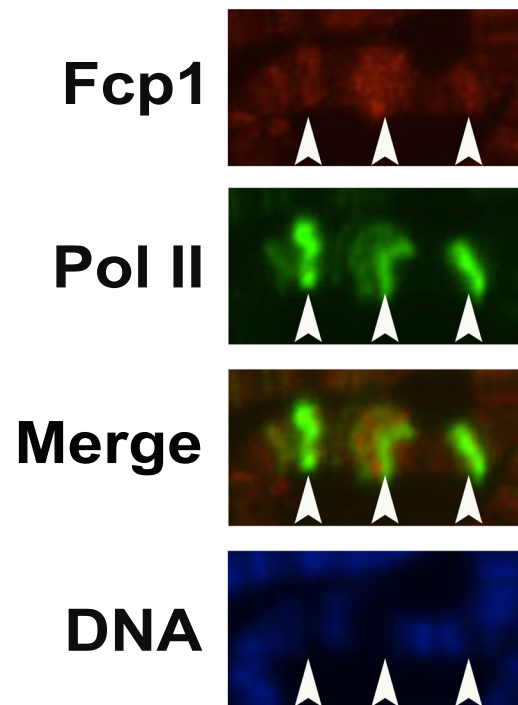

**Figure S1. Localization of Fcp1 at *Hsp70* loci after recovery from heat shock.**

Immunofluorescence staining of polytene chromosomes with antibodies specific to Fcp1 (red) and Serine 5 phosphorylated Pol II CTD (H14 antibody, green) after a 10 minute HS and 60 minutes recovery at room temperature. The arrows indicate the *Hsp70* loci (87A and 87C (endogenous) and a single *Hsp70* transgene at 87E) from left to right. The DNA is stained with DAPI (blue). Merge is an overly of Fcp1 and Pol II.

# 10 minute heat shock

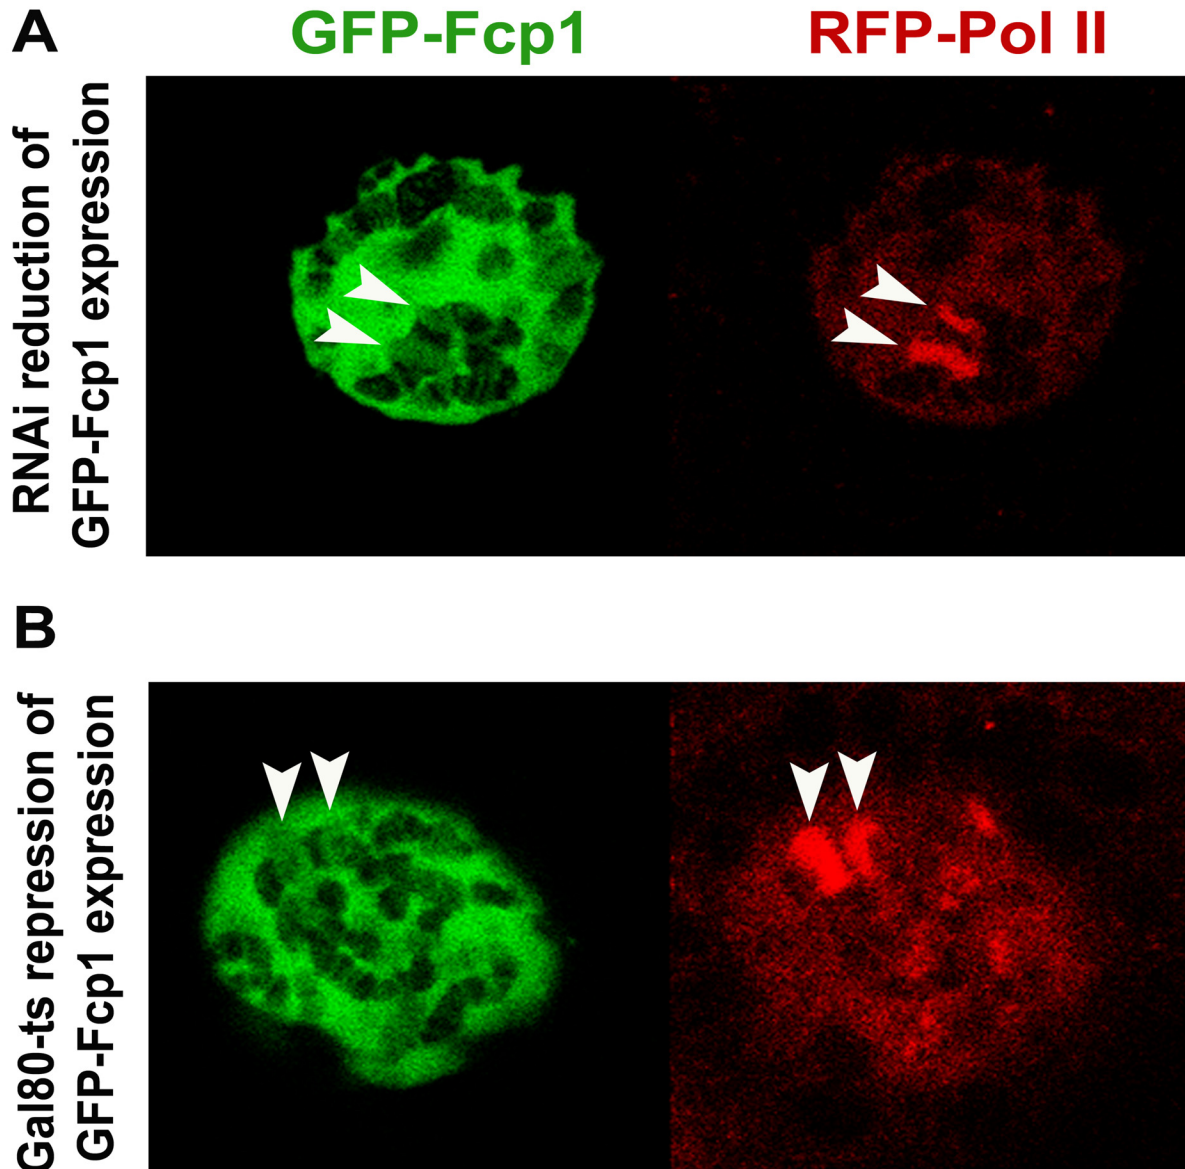

**Figure S2. GFP-Fcp1 localizes to the induced *Hsp70* loci in living cells.** Laser scanning confocal microscopy images of polytene nuclei co-expressing GFP-Fcp1 (green) and mRFP-Pol II (red) at 10 minute HS. Overexpression of GFP-Fcp1 in salivary glands using the Gal4-UAS system results in a small salivary gland phenotype that does not allow imaging (data not shown). In order to image GFP-Fcp1 in living cells, Fcp1 protein levels were reduced by RNAi depletion (**A**, GFP-Fcp1/+;Rpb3RN, 6983/WizFcp1RNAi) or using the Gal80-ts repressor (**B**, GFP-Fcp1/+;Rpb3RN, 6983/7017) grown at room temperature. Arrows highlight the *Hsp70* loci.

## Figure S3

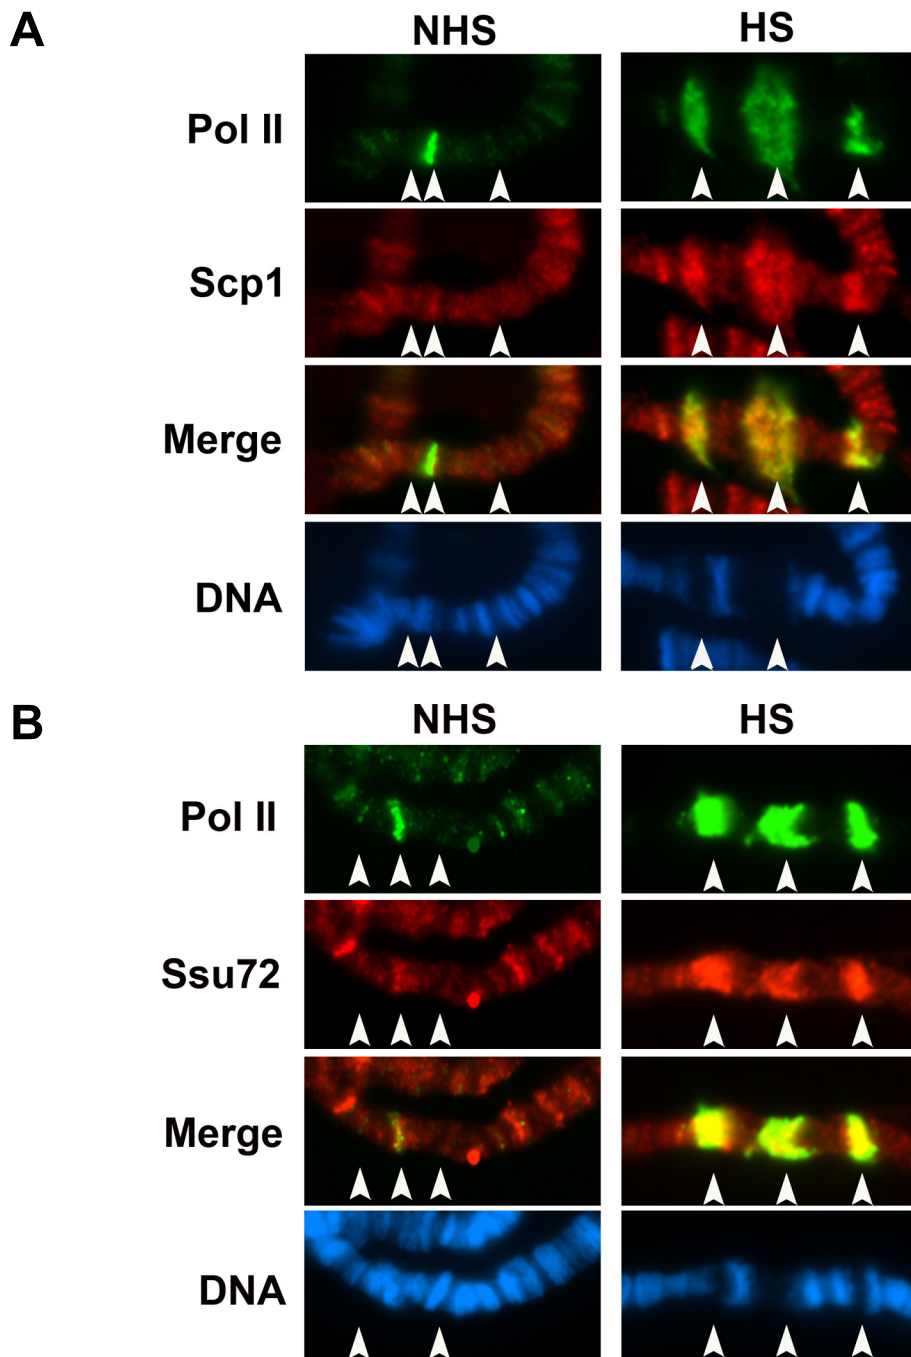

**Figure S3. CTD phosphatases Scp1 and Ssu72 localize to active *Hsp70* loci.** Immunostaining of polytene chromosomes with (A) Scp1 or (B) Ssu72 antibodies (red) and Serine 5 phosphorylated Pol II CTD (H14 antibody, green) at the *Hsp70* loci (87A and 87C (endogenous) and a single *Hsp70* transgene at 87E) from left to right (indicated with the arrows) under NHS and HS conditions. The DNA is stained with DAPI (blue). Merge is an overlay of Ssu72 or Scp1 with Pol II.



## Figure S4

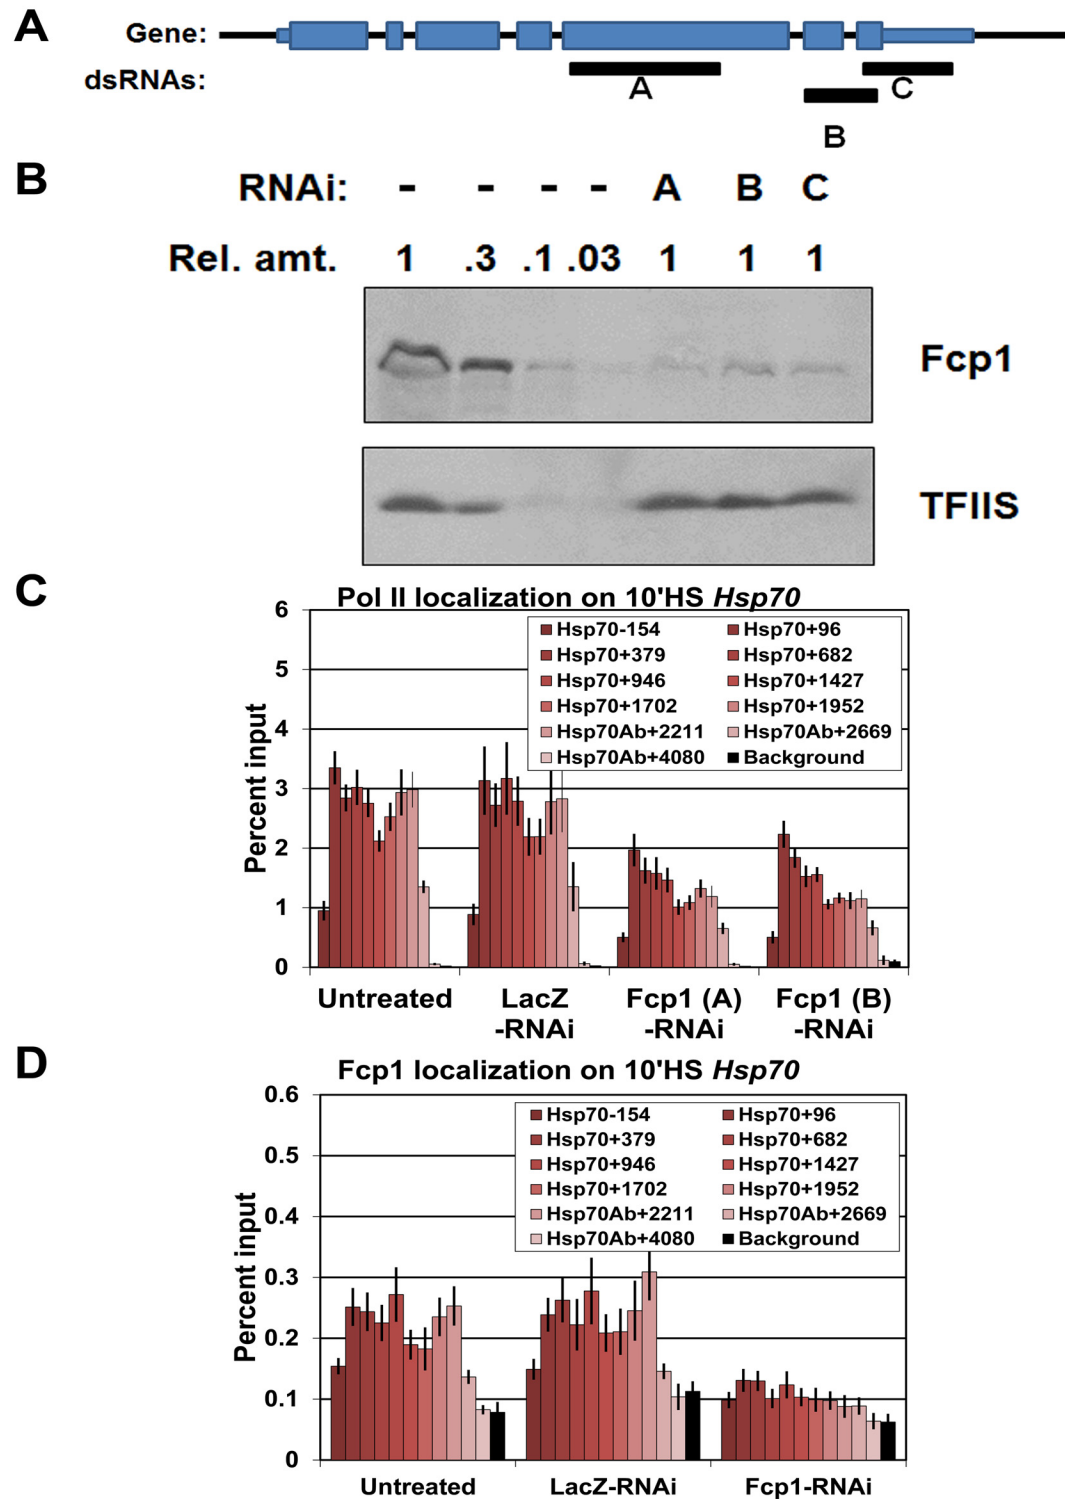

**Figure S4. Multiple dsRNAs result in similar depletion of Fcp1.** (A) The location of the three dsRNAs used to knock-down Fcp1 (A: +1502 to +2290, B: +2720 to +3103, C: +3017 to +3486, relative to the TSS). The blue areas represent the region included in the mRNA, with the thicker regions indicating the coding region and the narrow regions indicating the UTRs. (B) Western blots of whole cell extracts from control (-) and each Fcp1 RNAi (A-C) probed with antibodies for Fcp1 (lab stock, 1:1000) and TFIIS (lab stock loading control, 1:3000). The relative amount loaded is indicated (1=1x10<sup>6</sup> cells). (C) ChIP results for the Pol II subunit Rpb3 enrichment on the *Hsp70* gene in Untreated, LacZ-RNAi, and Fcp1-RNAi (A and B dsRNAs) S2 cells at 10 minute HS. (D) ChIP results for the Fcp1 enrichment on the *Hsp70* gene in Untreated, LacZ-RNAi and Fcp1-RNAi (A dsRNA) S2 cells at 10 minute HS. The legends indicate the midpoint of each PCR fragment (*Hsp70Ab* indicates primer sets specific for the Ab copy of *Hsp70*). The error bars indicate the SEM of at least three biological replicates.

# Figure S5

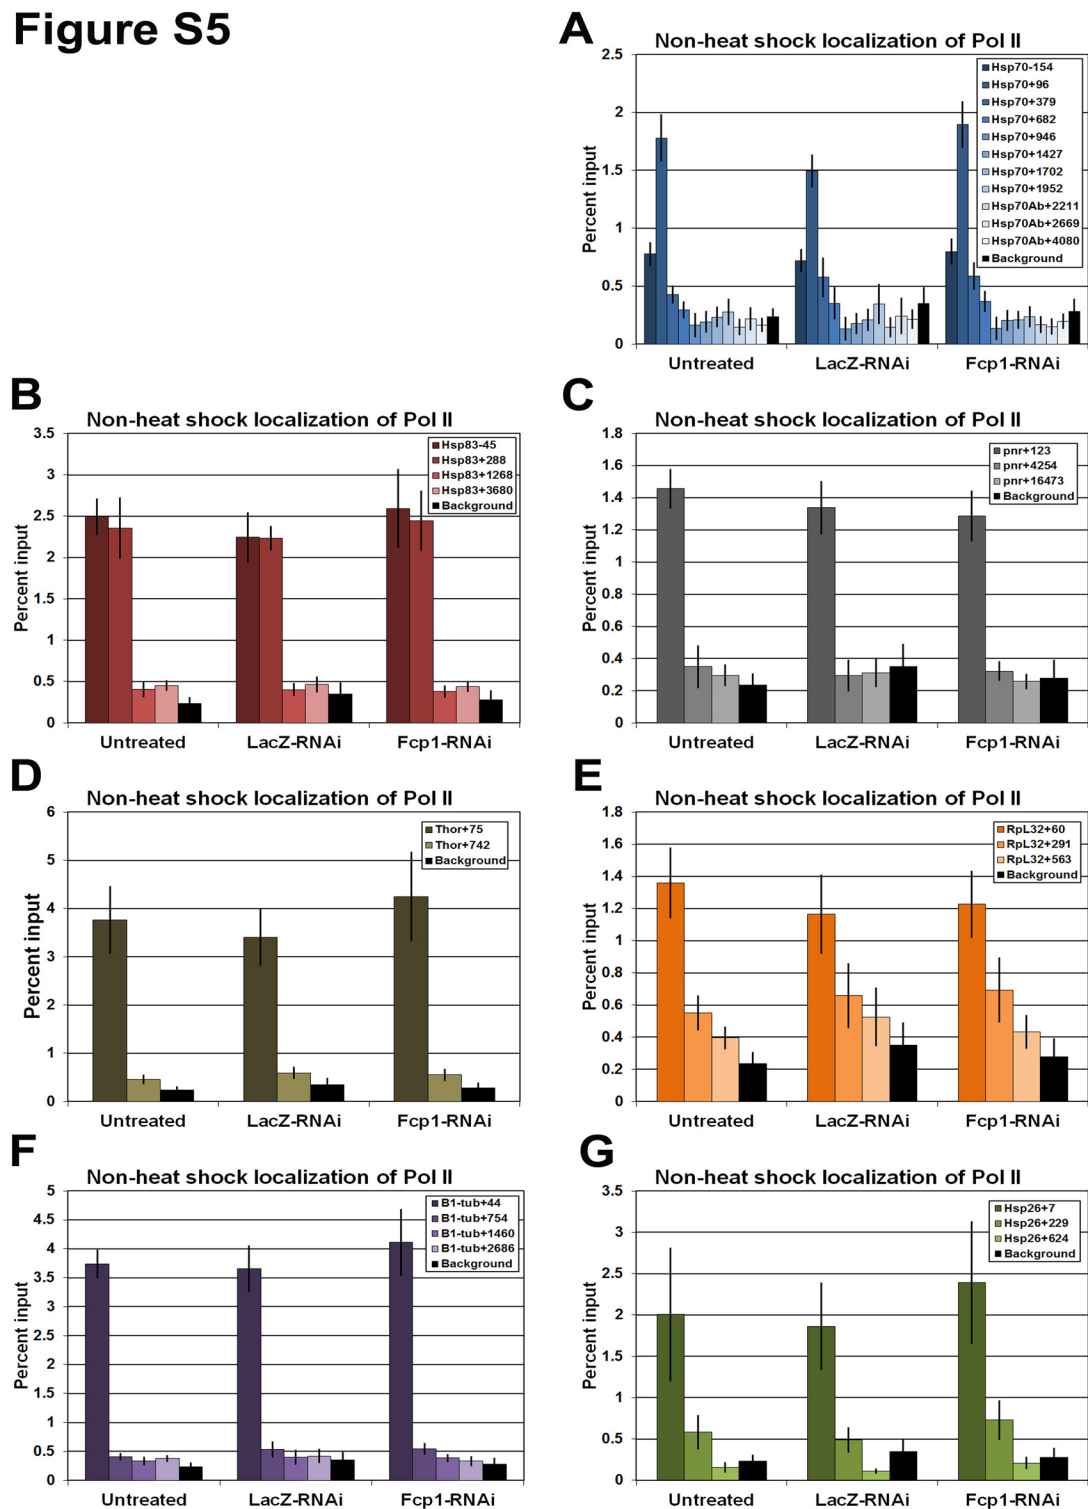

**Figure S5. Constitutively expressed genes are not detectably affected by Fcp1 knock-down.** (A-E) ChIP results for the Pol II subunit Rpb3 enrichment in Untreated, LacZ-RNAi, and Fcp1-RNAi S2 cells at the (A) *Hsp70*, (B) *Hsp83*, (C) *pnr*, (D) *Thor*, (E) *RpL32*, (F)  $\beta$ -1-tubulin, and (G) *Hsp26* genes under NHS conditions. The legends indicate the midpoint of each PCR fragment (*Hsp70Ab* indicates primer sets specific for the Ab copy of *Hsp70*). The error bars indicate the SEM of at least three biological replicates.

**Figure S6**

**A**

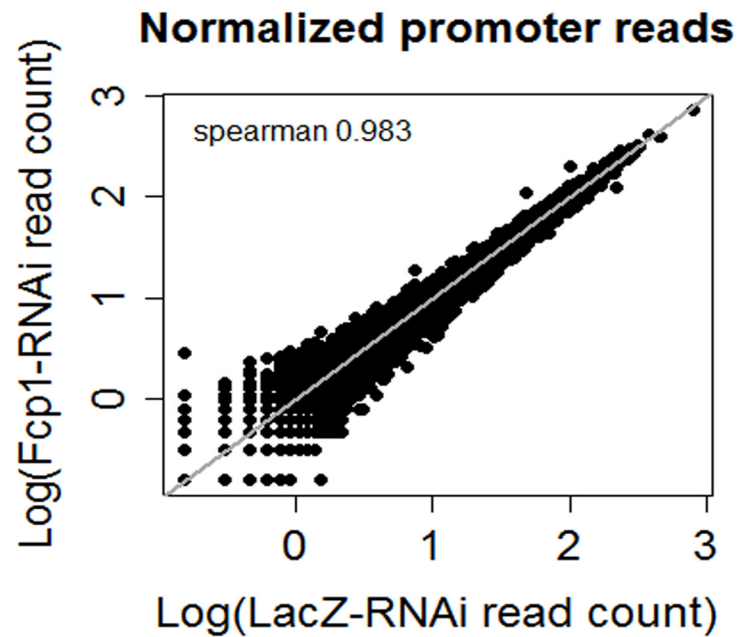

**B**

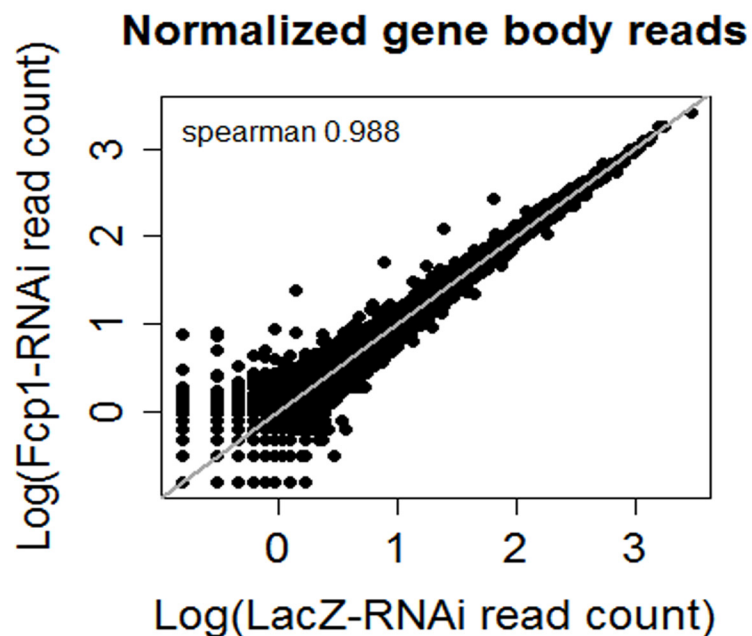

**Figure S6. A genome-wide assay shows constitutively expressed genes are not detectably affected by Fcp1 knock-down.** GRO-seq was performed in LacZ-RNAi and Fcp1-RNAi cells under NHS conditions to determine the levels of transcriptionally engaged polymerase. **(A)** Normalized read density (log<sub>10</sub>) from global run-on sequencing (GRO-seq) in promoter regions from LacZ-RNAi and Fcp1-RNAi cells under NHS conditions. The gray line indicates a one-to-one ratio of reads. The spearman correlation between the two datasets is 0.983. **(B)** Normalized GRO-seq read density (log<sub>10</sub>) in the gene body from LacZ-RNAi and Fcp1-RNAi cells under NHS conditions. The gray line indicates a one-to-one ratio of reads. The spearman correlation between the two datasets is 0.988. Edge-R was used to identify genes with significantly different read counts between LacZ-RNAi and Fcp1-RNAi (4), and no genes had significantly lower read counts in either the promoter or gene body regions of the Fcp1-RNAi library.

## Figure S7

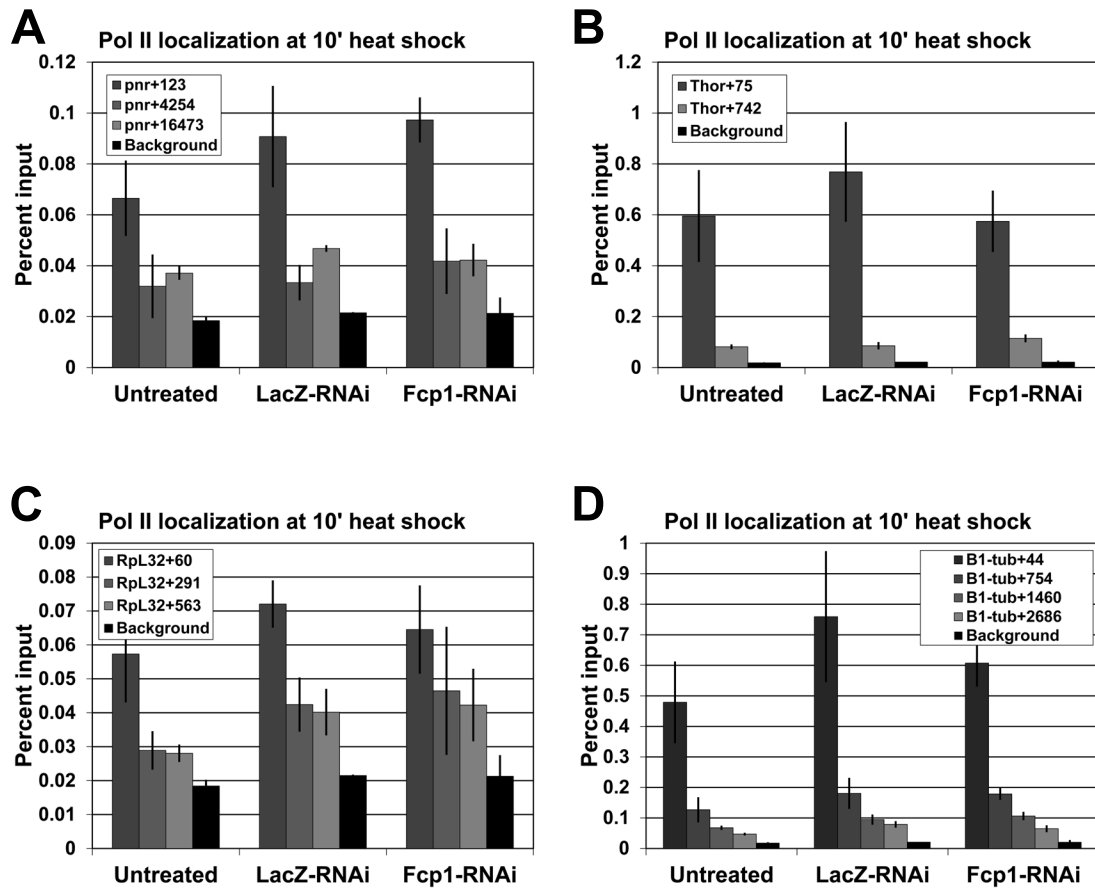

**Figure S7. Constitutively expressed genes are not detectably affected by Fcp1 knock-down during heat shock.** ChIP results for the Pol II subunit Rpb3 enrichment on the (A) *pnr*, (B) *Thor*, (C) *RpL32*, (D)  $\beta$ -1-tubulin genes at 10 minutes of heat shock in Untreated, LacZ-RNAi, and Fcp1-RNAi S2 cells. The legends indicate the midpoint of each PCR fragment. The error bars indicate the SEM of at least three biological replicates.

**Figure S8**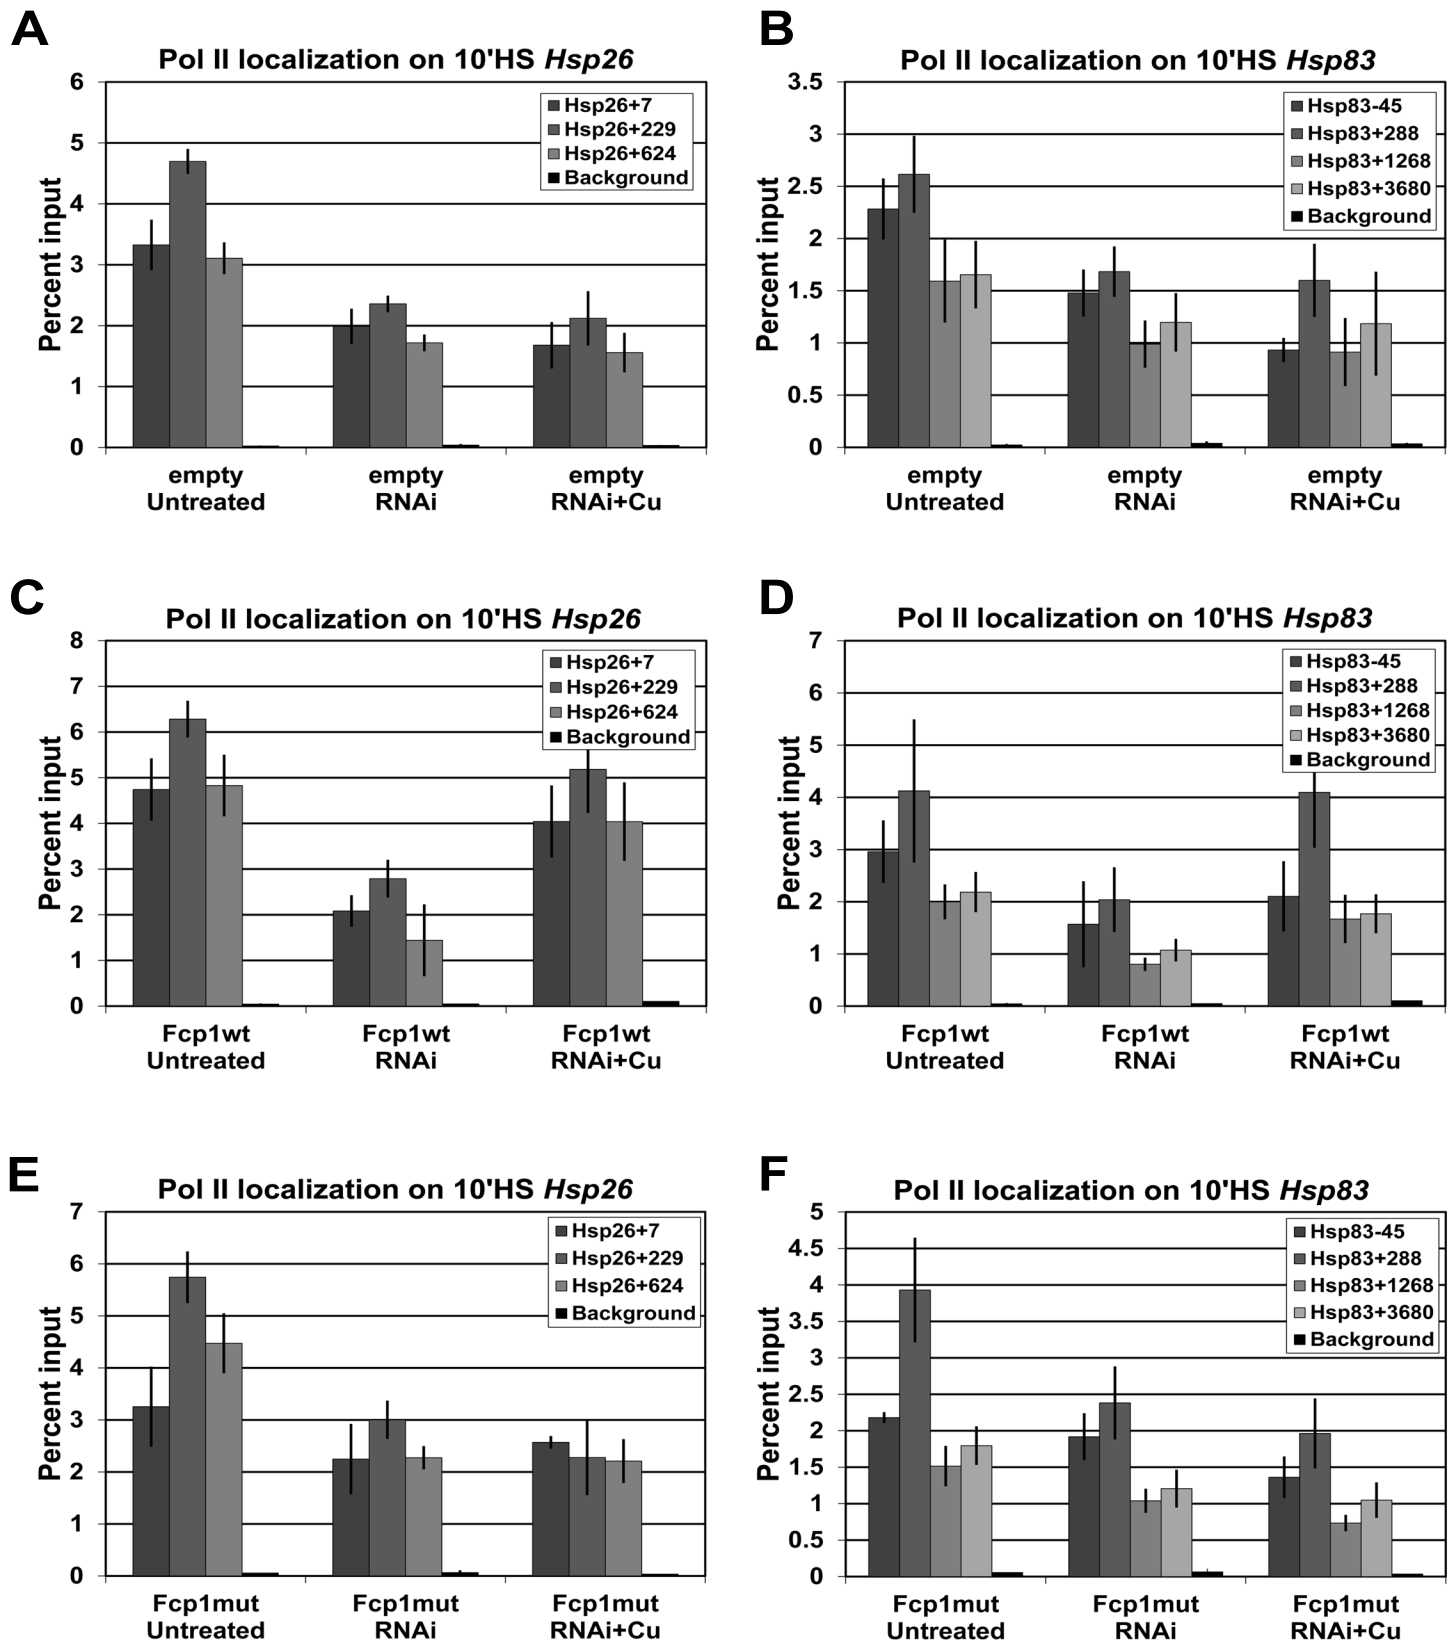

**Figure S8. Re-expression of wild type, but not catalytically dead, Fcp1 partially restores Pol II levels on heat shock induced *Hsp26* and *Hsp83*.** ChIP results for the Pol II subunit Rpb3 enrichment on (A,C,E) *Hsp26* and (B,D,F) *Hsp83* at 10 minutes of heat shock +/- Fcp1-RNAi and +/- Cu induction of the transgene from (A,B) control (empty vector), (C,D) FLAG-tagged wild type Fcp1 transgenic (Fcp1wt) cells, and (E,F) FLAG-tagged catalytically dead mutant Fcp1 transgenic (Fcp1mut) cells. The legends indicate the midpoint of each PCR fragment. The error bars indicate the SEM of at least three biological replicates.

## Figure S9

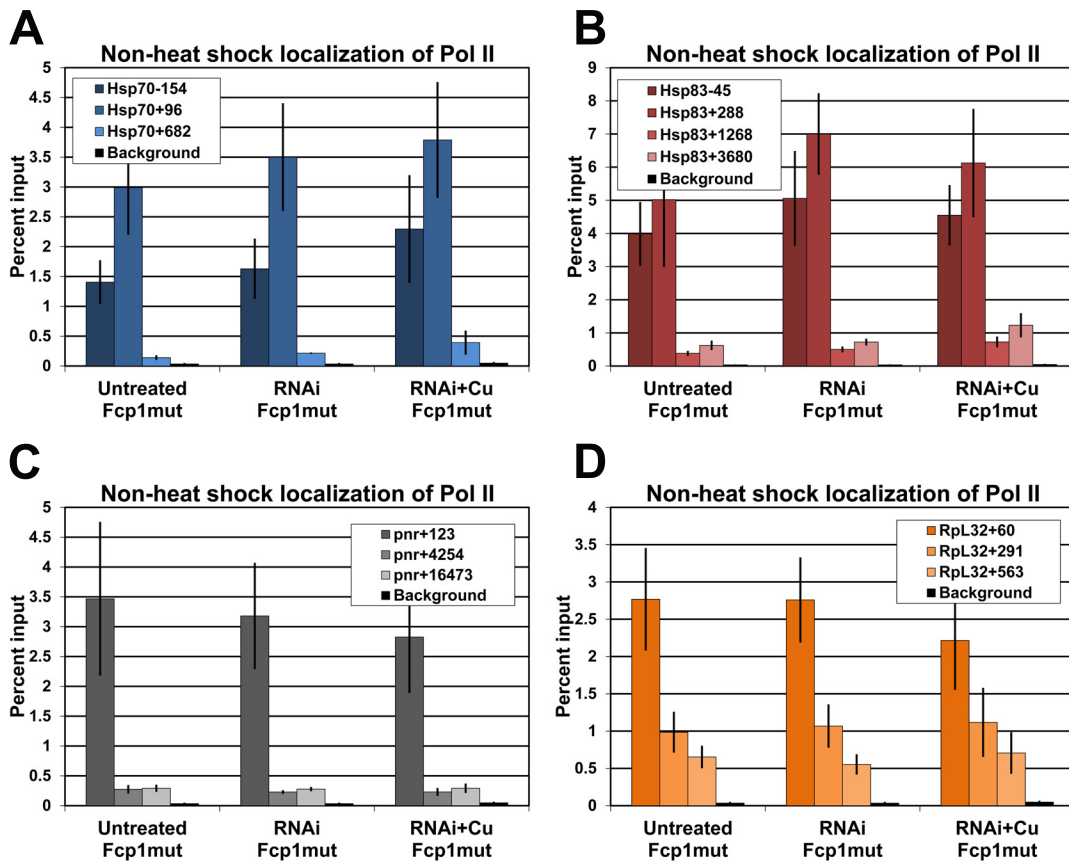

**Figure S9. Re-expression of the catalytically dead Fcp1 mutant does change levels of Pol II on constitutively expressed genes.** ChIP results for the Pol II subunit Rpb3 enrichment on (A) *Hsp70*, (B) *Hsp83*, (C) *pnr*, and (D) *RpL32* genes under non-heat shock conditions +/- Fcp1-RNAi and +/- Cu induction of the FLAG-tagged catalytically dead mutant Fcp1 transgene. The legends indicate the midpoint of each PCR fragment. The error bars indicate the SEM of at least three biological replicates.

Figure S10

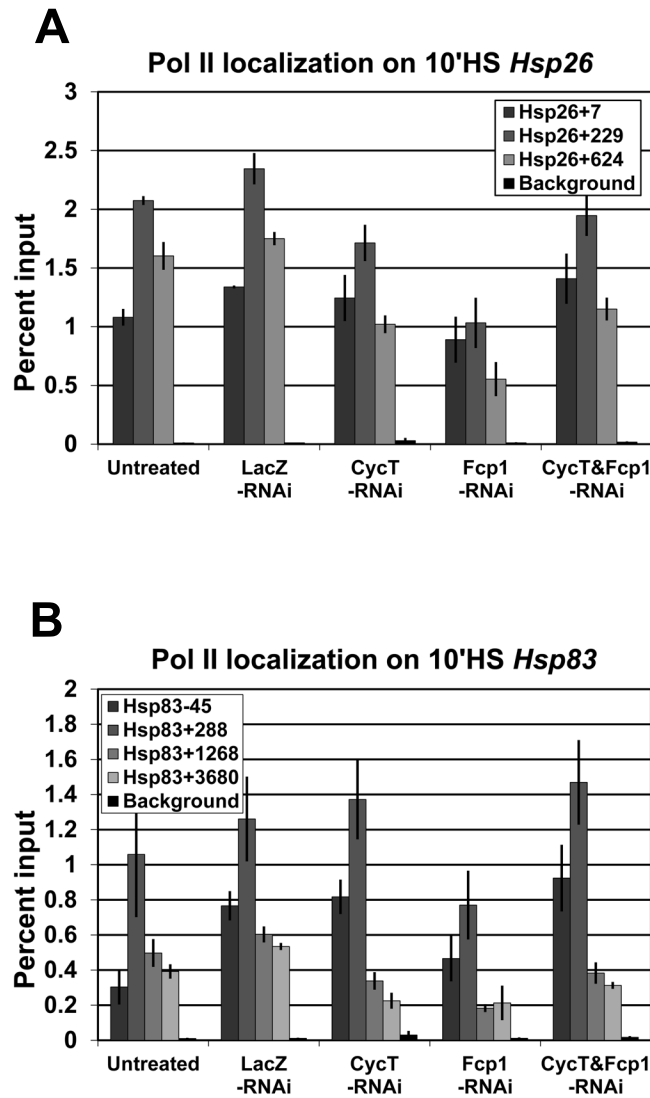

**Figure S10. Co-depletion of Cyclin T1 with Fcp1 partially restores Pol II levels on heat shock induced *Hsp26* and *Hsp83*.** ChIP results for the Pol II subunit Rpb3 enrichment on (A) *Hsp26* and (B) *Hsp83* genes at 10 minutes of heat shock in Untreated, LacZ-RNAi, Cyclin T1-RNAi, Fcp1-RNAi, and CyclinT1+Fcp1-RNAi S2 cells. The legends indicate the midpoint of each PCR fragment. The error bars indicate the SEM of at least three biological replicates.

**Figure S11**

**Extremely high expression (Hsp genes during HS)**      **Lower expression (genes during NHS)**

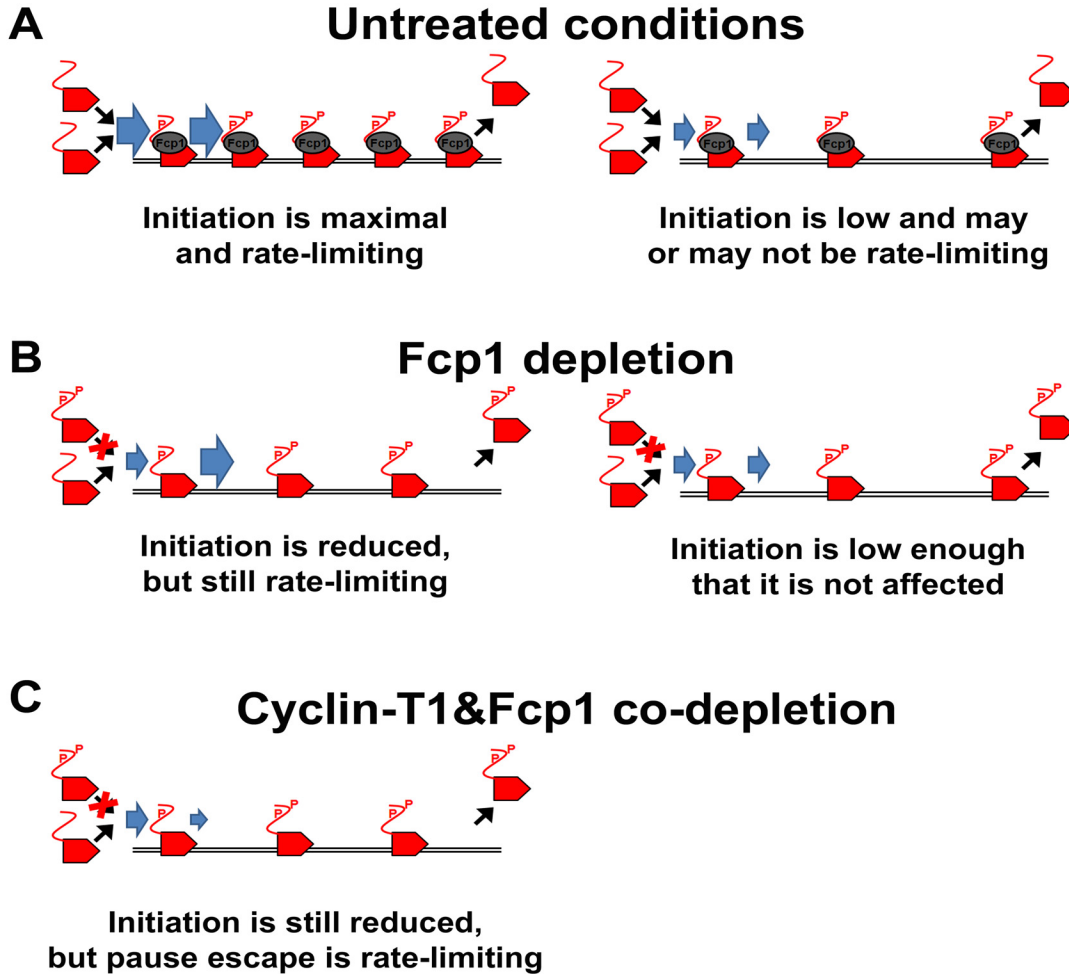

**Figure S11. Model for results.** (A) Highly expressed heat shock genes rapidly recruit and release Pol II, and other genes have much lower rates of Pol II recruitment and release (Pol II is represented by the red rocket with CTD tail, and the rates of initiation and pause release are indicated by the size of the blue arrows). (B) Fcp1 knock-down increases the amount of phosphorylated free Pol II (represented by Ps on the CTD tail). Because the phosphorylated Pol II cannot initiate transcription, this reduces Pol II initiation on heat shock genes, but the lower initiation rates on other genes allow enough time to bind an initiation-competent Pol II. (C) Cyclin-T1 knock-down lowers the release rate, and the pause region is fully occupied by Pol II in co-depleted cells because the reduced release rate allows the heat shock genes enough time to bind an initiation-competent Pol II.
